# Supplementary material for: Cautionary Remarks on the Planetary Boundary Visualisation
Source: Copernicus journal article supplement (doi:10.5194/egusphere-2023-2760), 2023-12-11

Colour-vision-deficiency simulation  
*Deuteranopia*

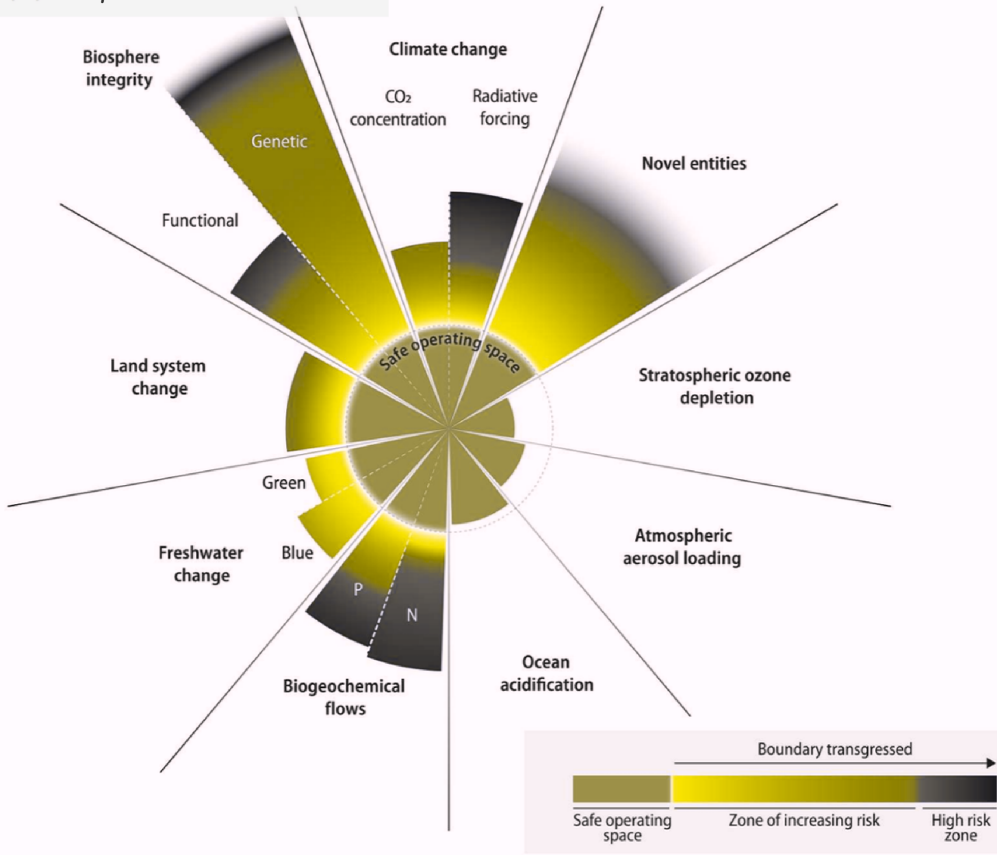

Colour-vision-deficiency simulation  
*Protanopia*

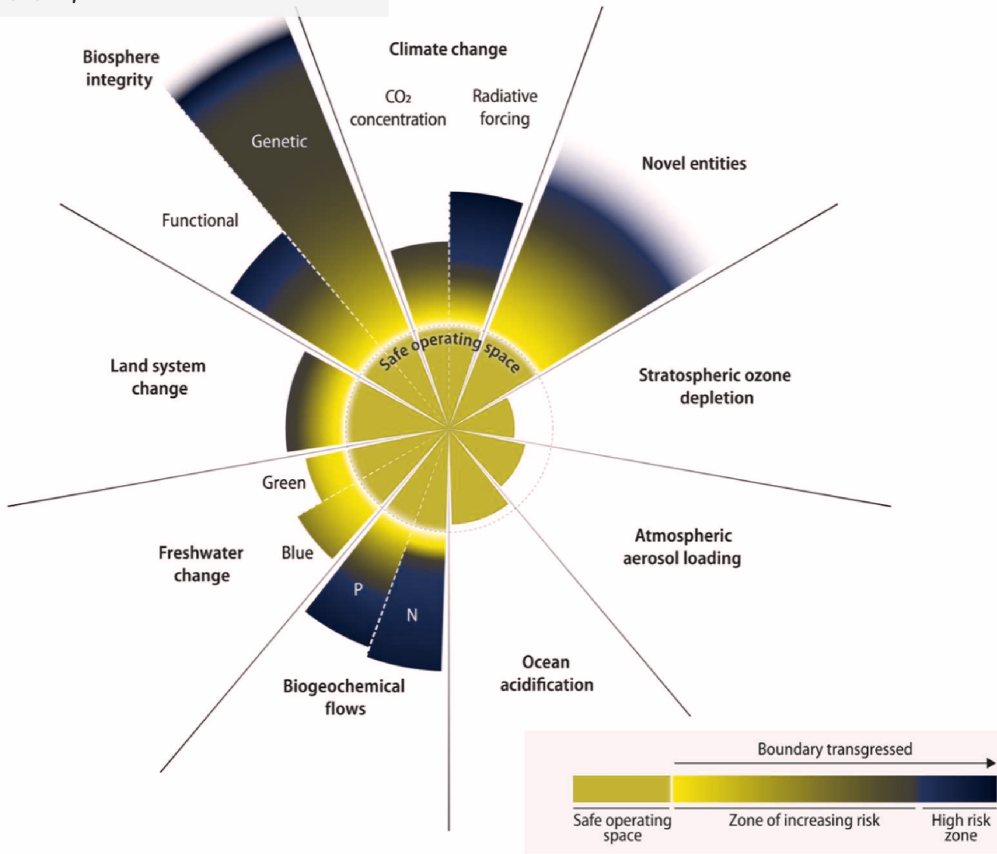

Colour-vision-deficiency simulation  
*Tritanopia*

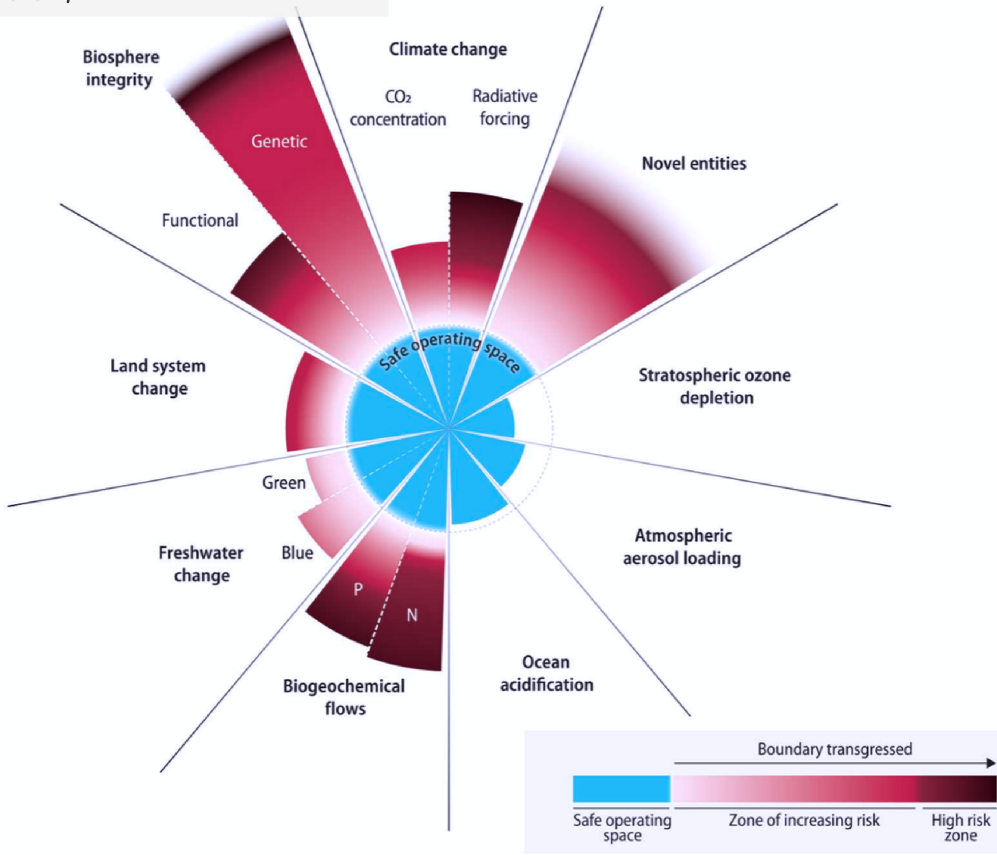

Alternate vision simulation  
*Grey-scale*

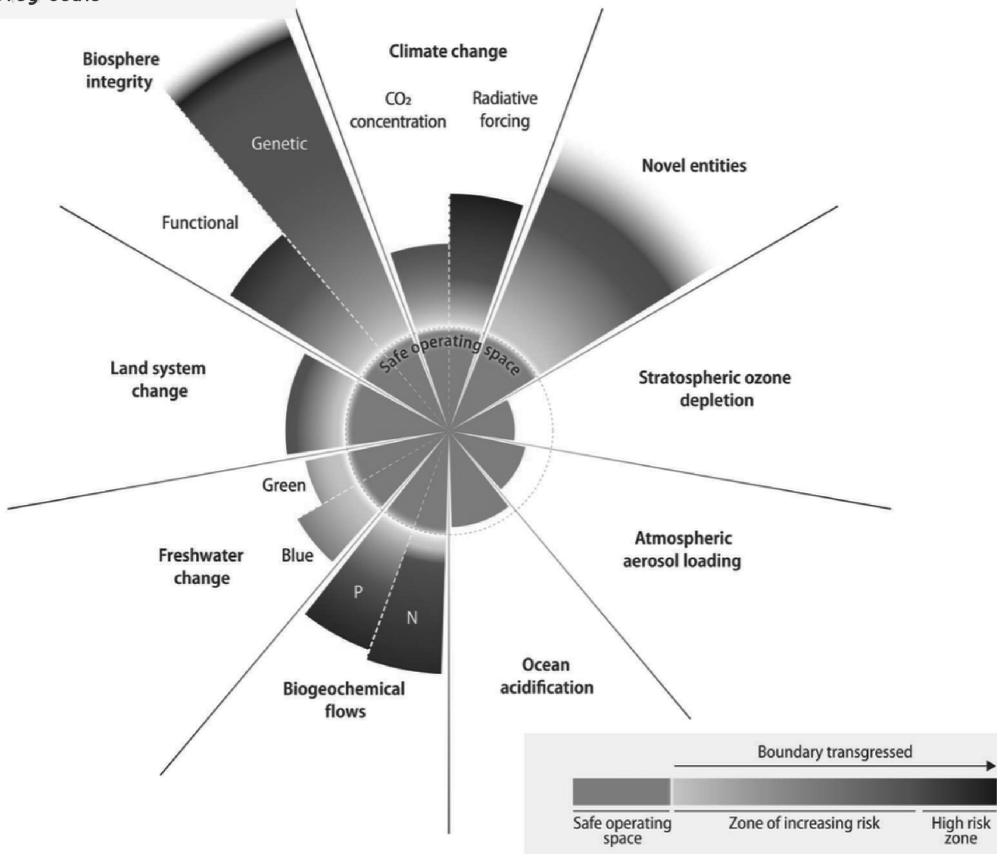

Supplement: Supplementary file [file egusphere-2023-2760-RC2-supplement.pdf]
